# Supplementary material
Source: publisher site journal article supplement (https://www.dovepress.com/article/330372)
Supplement: Supplementary file 1 [file get_supplementary_file.php]

**Appendix 1** Tokushukai Dementia Research Group.

**<Co-Investigator>**

Satoru Takahashi, Tokushukai Group Tokyo Headquarters

**<Investigators>**

Kenji Ohyama, Matsubara Tokushukai Hospital

Masaki Nakato, Obihiro Tokushukai Hospital

Tetsumasa Kamei, Shonan Fujisawa Tokushukai Hospital

Masataka Fukue, Koga General Hospital

Yasushi Terada, Shonai Amarume Hospital

Shuichi Oshima, Yotsukaidou Tokushukai Medical Center

Makoto Izuta, Kishiwada Tokushukai Hospital

Yoshihiro Omori, Takasago Seibu Hospital

Junya Kawada, Shonan Kamakura General Hospital

Yasutaka Kurokawa, Sapporo Tokushukai Hospital

Yoshitoshi Kida, Hanyu General Hospital

Shinya Iida, Medical Corporation Kagoshima Tokushukai Hospital

Masao Motomochi, Sapporo Higashi Tokushukai Hospital

Isao Kitahara, Chiba Tokushukai Hospital

Motoki Sano, Chiba Nishi General Hospital

Tsunekazu Takagi, Kobe Tokushukai Hospital

Shuji Noguchi, Yamagawa Hospital
